# Supplementary material
Source: Springer Nature journal article supplement (https://www.springermedizin.de/resource/supplementary/12958_2011_855_MOESM3_ESM.pdf/9569028)

# IL-8 mRNA in cell types

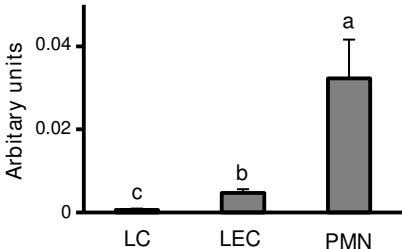

Supplement: MOESM3 [file 9569028]
